# Supplementary material for: Emergence of the super antenna effect in mixed crystals of ytterbium and lutetium complexes showing near-infrared luminescence
Source: Royal Society of Chemistry journal article supplement (doi:10.1039/d2ra06007h), 2022-01-01
Supplement: d2ra06007h1.pdf [file d2ra06007h1.pdf]

### Supporting Information

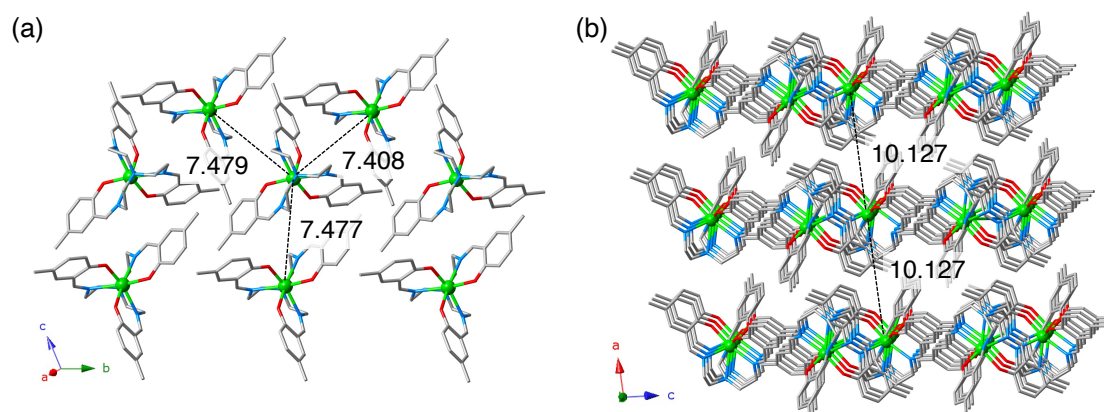

Fig. S1 Crystal packing of YbL reported in *ChemistryOpen*, **2021**, *10*, 46. (a) Plane-like structure in the  $bc$  plane and (b) stacked plane-like structure along the  $a$  axis. Gray, blue, and red sticks represent C, N, and O atoms, respectively. Green balls represent Yb(III). Hydrogen atoms were omitted for clarity. Yb...Yb distances below 10 Å are shown.

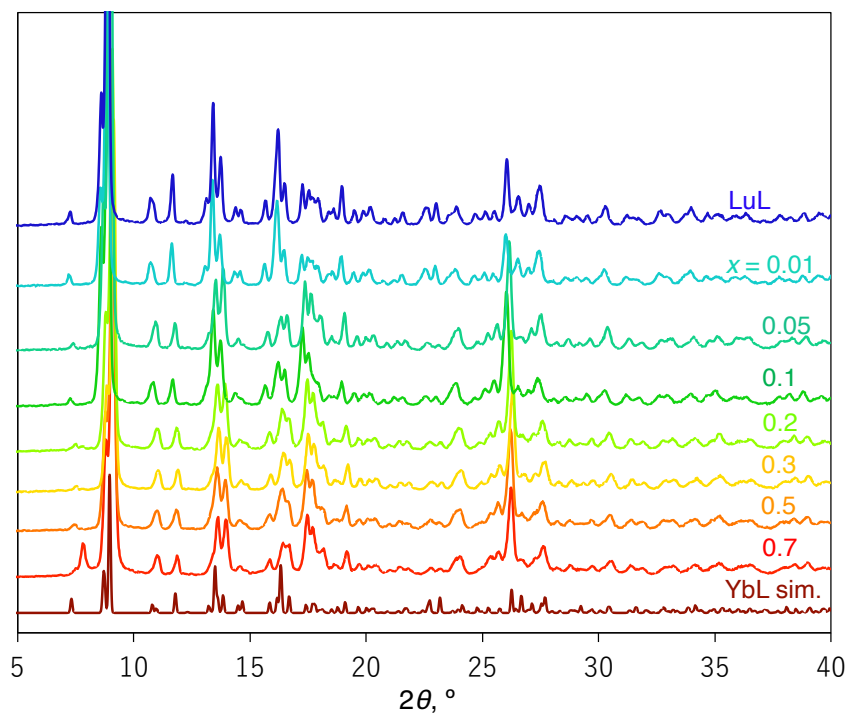

Fig. S2 PXRD patterns of LuL and  $(\text{YbL})_x(\text{LuL})_{1-x}$ , and that simulated from the single-crystal X-ray diffraction data of YbL, which was reported in *ChemistryOpen*, **2021**, *10*, 46.

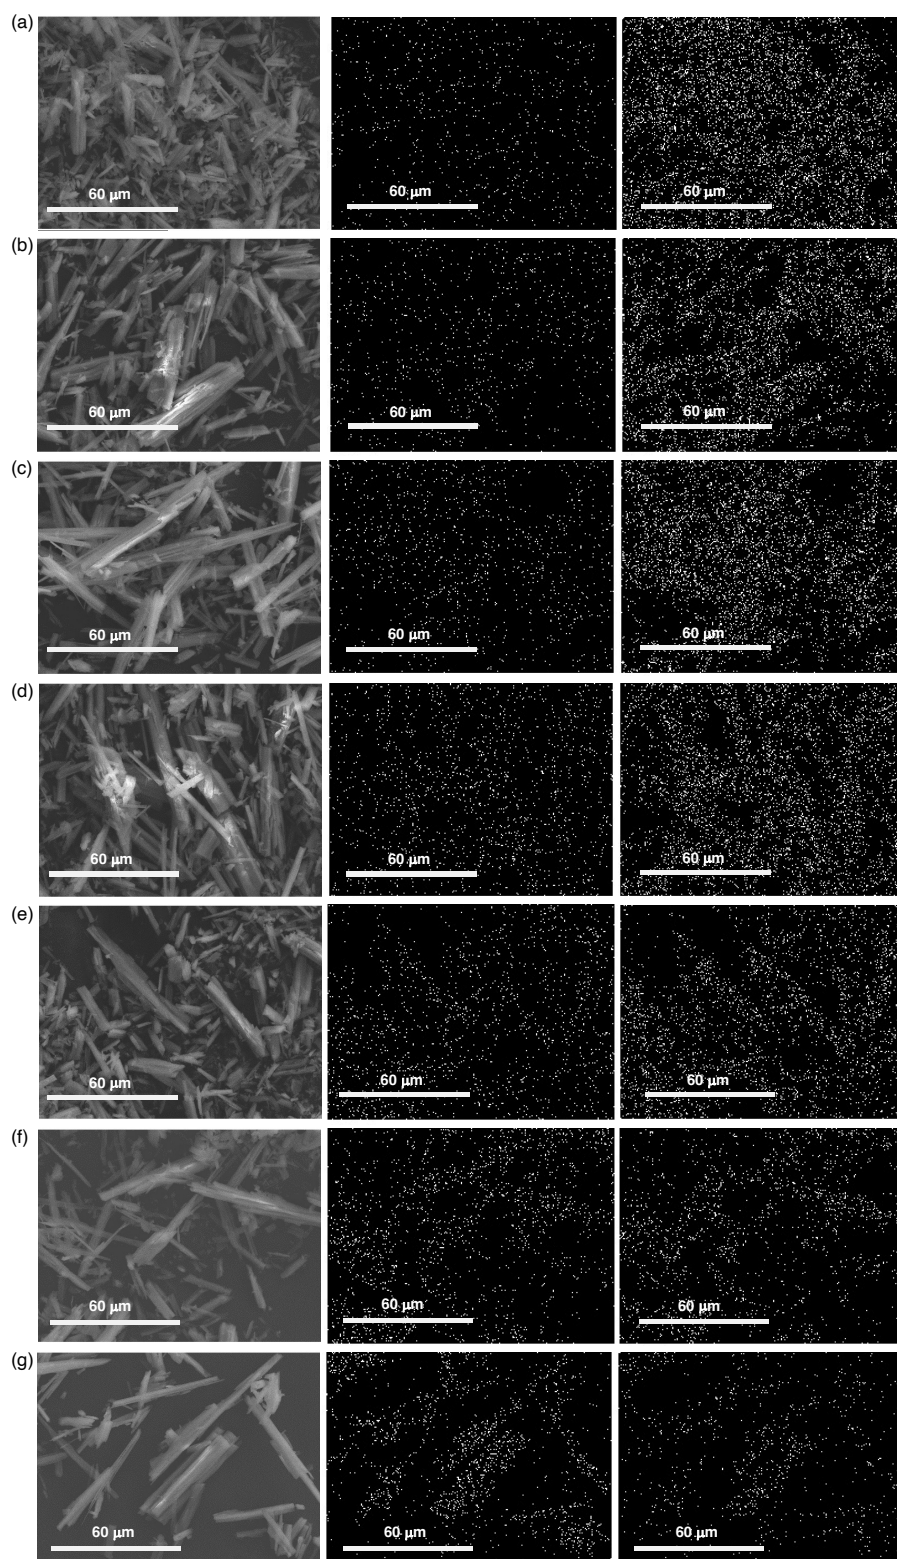

Fig. S3 SEM-EDX image of  $(\text{YbL})_x(\text{LuL})_{1-x}$  ( $x =$  (a) 0.01, (b) 0.05, (c) 0.1, (d) 0.2, (e) 0.3, (f) 0.5, and (g) 0.7. Left : electron micrograph, middle : EDX map of Yb  $L\alpha$ , right : EDX map of Lu  $L\alpha$ .

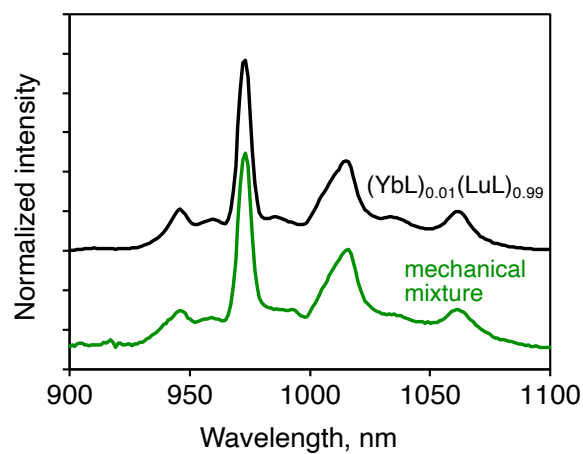

Fig. S4 Solid-state NIR luminescence spectra of  $(\text{YbL})_{0.01}(\text{LuL})_{0.99}$  (black line) and mechanical mixture of YbL and LuL at a 1 : 99 molar ratio (green line) normalized at 1061 nm ( $\lambda_{\text{ex}} = 416$  nm).

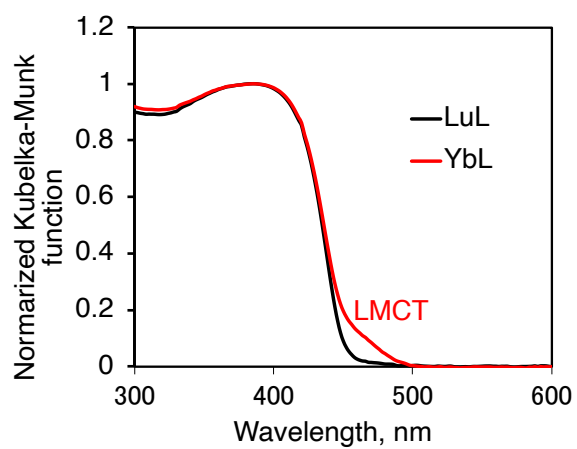

Fig. S5 Diffuse reflectance spectra of the powder of LuL. Red line shows spectrum for YbL reported in *ChemistryOpen*, **2021**, *10*, 46.

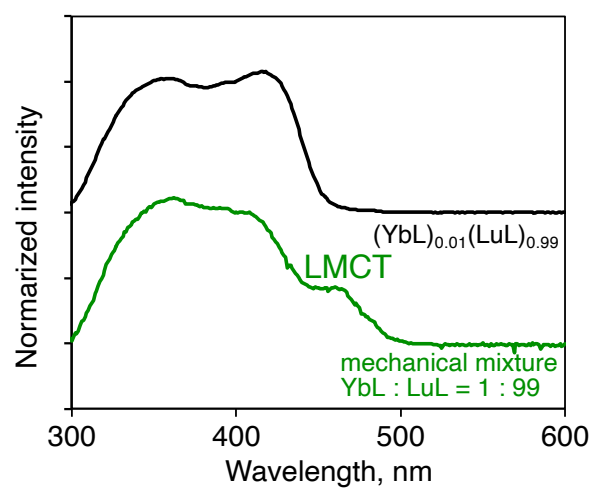

Fig. S6 Solid-state excitation spectra of  $(\text{YbL})_{0.01}(\text{LuL})_{0.99}$  (black line) and mechanical mixture of YbL and LuL at a 1 : 99 molar ratio (green line) normalized at 400 nm ( $\lambda_{\text{em}} = 972$  nm).
